# Supplementary material for: Identification of Active Species in Photodegradation of Aqueous Imidacloprid over g-C3N4/TiO2 Nanocomposites
Source: MDPI journal article supplement (doi:10.3390/catal12020120), 2022-01-19
Supplement: s1 [file s1]

### Supplementary file

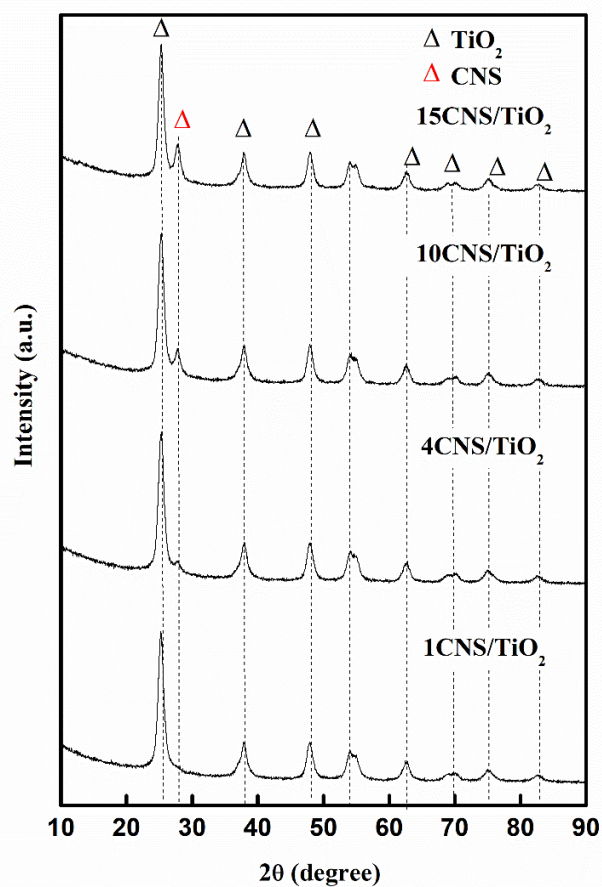

**Figure S1.** Powder XRD patterns of 1CNS/ $\text{TiO}_2$ , 4CNS/ $\text{TiO}_2$ , 10CNS/ $\text{TiO}_2$  and 15CNS/ $\text{TiO}_2$ .

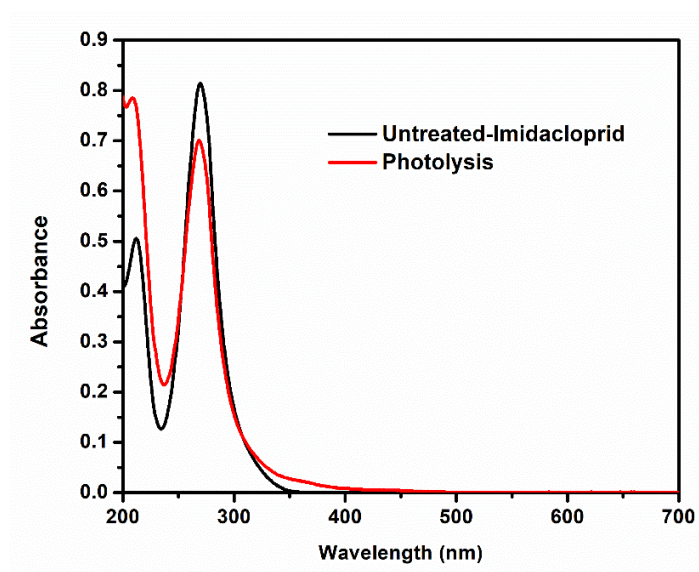

**Figure S2.** Photolysis of imidacloprid.
